# Supplementary material for: Eco-friendly polyethylene glycol (PEG-400): a green reaction medium for one-pot, four-component synthesis of novel asymmetrical bis-spirooxindole derivatives at room temperature
Source: PubMed Central journal article supplement (PMC9077237; doi:10.1039/c7ra13133j), 2018-01-09

## Eco-friendly polyethylene glycol (PEG-400): a green reaction medium for one-pot, four-component synthesis of novel asymmetrical bis-spirooxindole derivatives at room temperature

Alireza Hasaninejad,<sup>\*†</sup>Maryam Beyrati<sup>†</sup>

2-amino-1'-(4-((2-amino-3-cyano-5'-methyl-2',5-dioxo-5,6,7,8-tetrahydrospiro[chromene-4,3'-indolin]-1'-yl)methyl)benzyl)-2',5-dioxo-5,6,7,8-tetrahydrospiro[chromene-4,3'-indoline]-3-carbonitrile **6a**

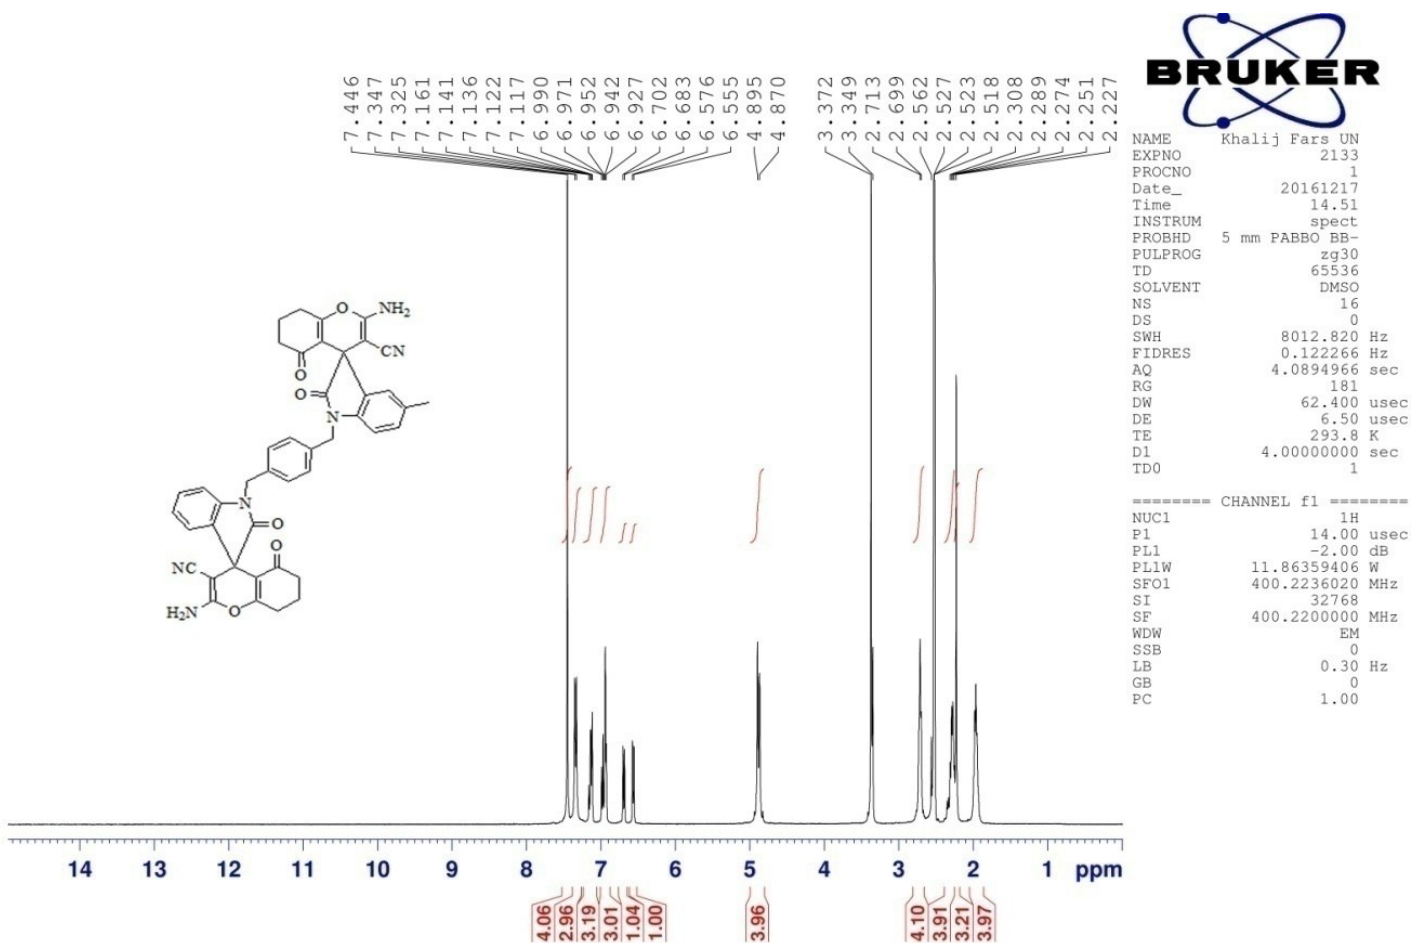



6'-amino-1-(4-(((6'-amino-5'-cyano-3',5-dimethyl-2-oxo-1'H-spiro[indoline-3,4'-pyrano[2,3-c]pyrazol]-1-yl)methyl)benzyl)-5-bromo-3'-methyl-2-oxo-1'H-spiro[indoline-3,4'-pyrano[2,3-c]pyrazole]-5'-carbonitrile **6b**

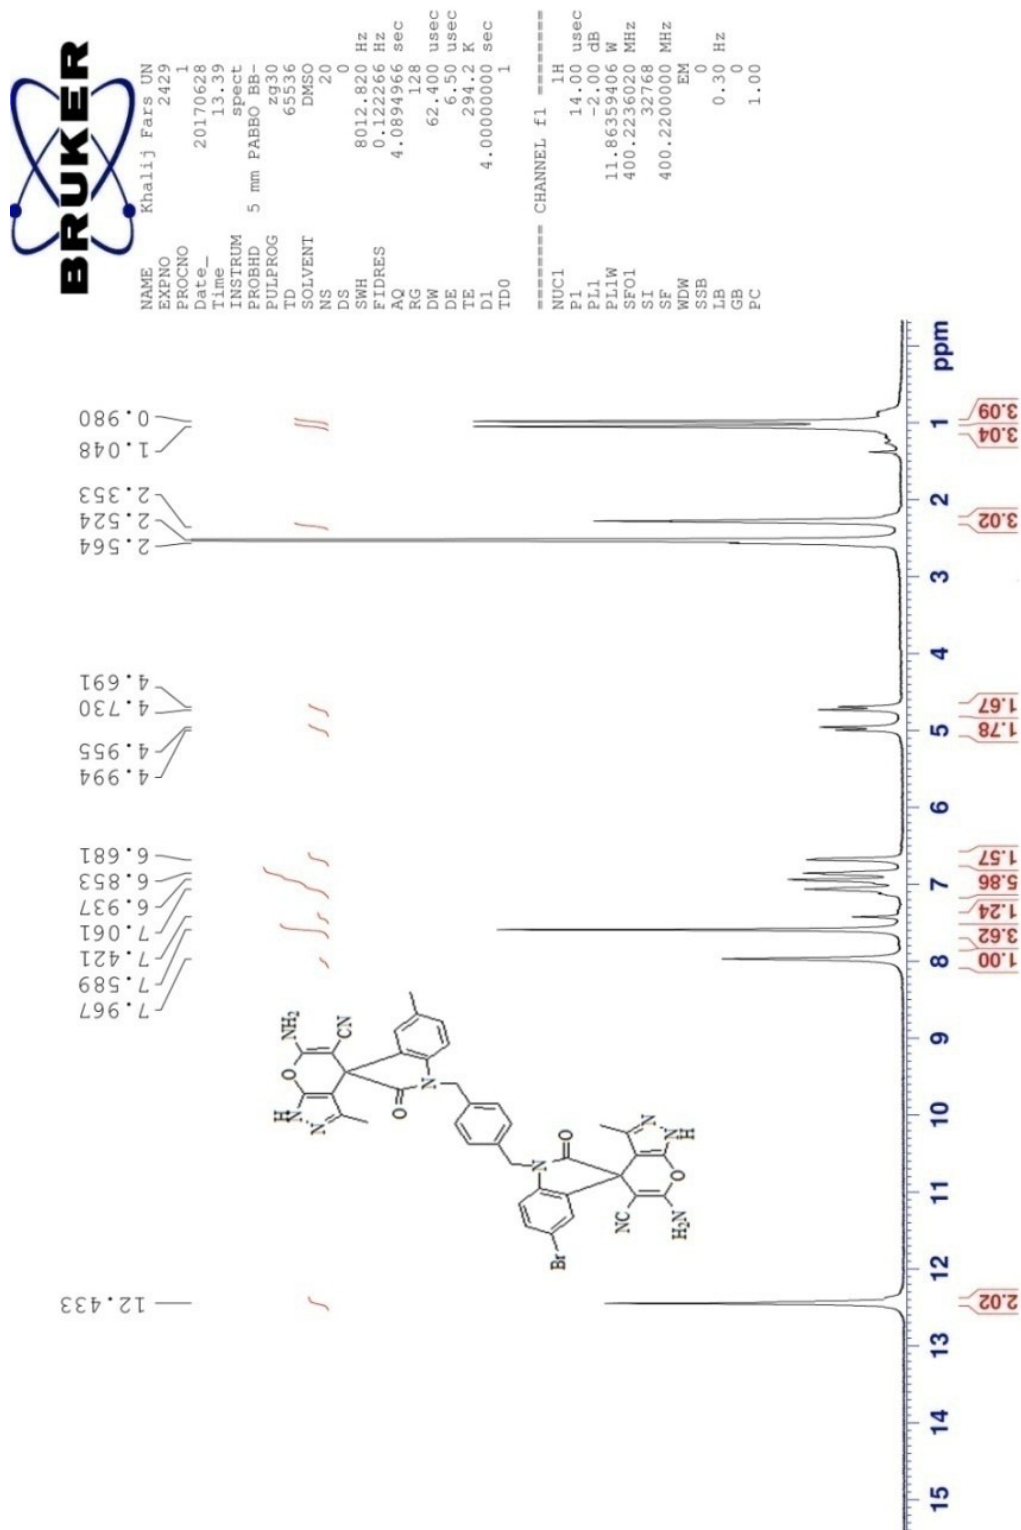

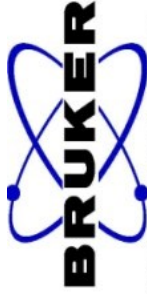

NAME Khaliq Fars UN  
EXPNO 1  
PROCNO 2450  
Date\_ 20170719  
Time\_ 8.11  
INSTRUM spect  
PROBHD 5 mm FAPBO BB-  
PULPROG zgpg30  
TD 65536  
SOLVENT DMSO  
NS 600  
DS 0  
SWH 35714.285 Hz  
FIDRES 0.544957 Hz  
AQ 0.9175540 sec  
RG 2050  
DW 14.000 usec  
DE 6.50 usec  
TE 292.8 K  
D1 1.00000000 sec  
D11 0.03000000 sec  
TD0 1

===== CHANNEL f1 =====  
NUC1 13C  
P1 9.00 usec  
PL1 -0.90 dB  
PL1W 42.02801895 W  
SFO1 100.6479784 MHz

===== CHANNEL f2 =====  
CPDPRG2 waltz16  
NUC2 1H  
PCPD2 90.00 usec  
PL2 -2.00 dB  
PL12 14.48 dB  
PL13 17.90 dB  
PL2W 11.86359406 W  
PL12W 0.26681873 W  
PL13W 0.12139934 W  
SFO2 400.2216009 MHz  
SI 32768  
SF 100.6353990 MHz  
WDW EM  
SSB 0  
LB 1.00 Hz  
GB 0  
PC 1.40

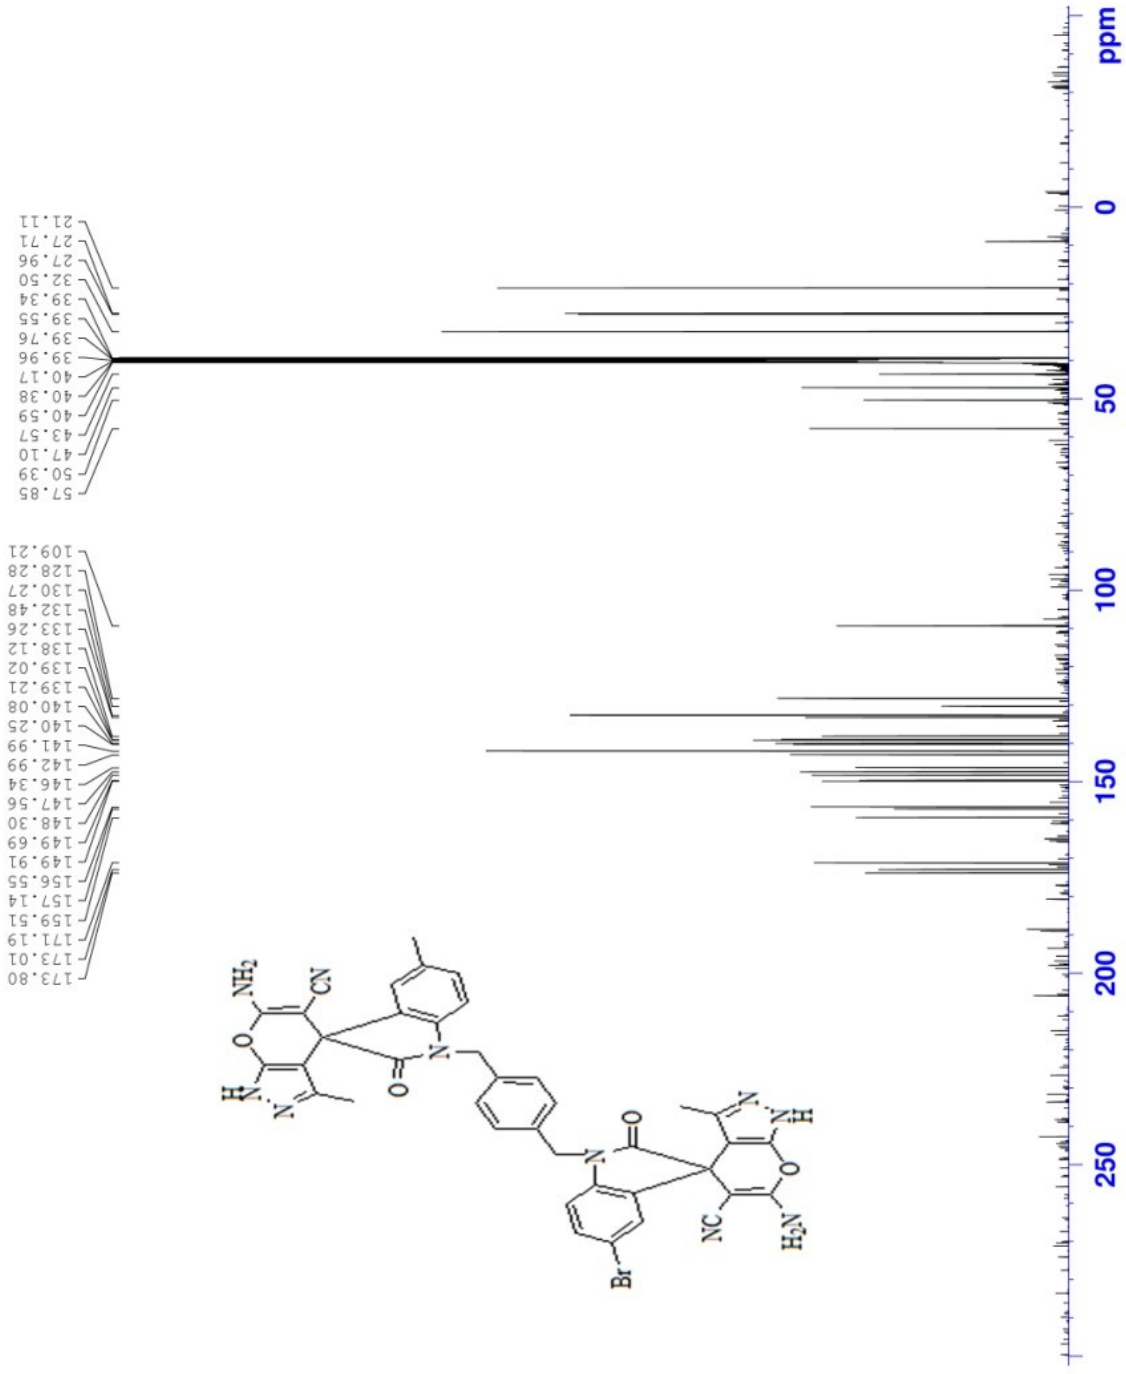

methyl 2'-amino-1-(4-(2'-amino-3'-(methoxycarbonyl)-5,7'-dimethyl-2,5'-dioxo-5'H-spiro[indoline-3,4'-pyrano[4,3-b]pyran]-1-yl)butyl)-5-fluoro-7'-methyl-2,5'-dioxo-5'H-spiro[indoline-3,4'-pyrano[4,3-b]pyran]-3'-carboxylate **6c**

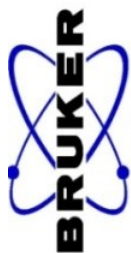

NAME Khalij Fars UN  
 EXPNO 2428  
 PROCNO 1  
 Date\_ 20170628  
 Time 13.30  
 INSTRUM spect  
 PROBHD 5 mm PABBO BB-  
 PULPROG zg30  
 ID 65536  
 SOLVENT DMSO  
 NS 40  
 DS 0  
 SWH 8012.820 Hz  
 FIDRES 0.122266 Hz  
 AQ 4.0894966 sec  
 RG 128  
 DW 62.400 usec  
 DE 6.50 usec  
 TE 294.2 K  
 D1 4.0000000 sec  
 TDO 1

===== CHANNEL f1 =====  
 NUC1 1H  
 P1 14.00 usec  
 PL1 -2.00 dB  
 PL1W 11.86359406 W  
 SFOL 400.2236020 MHz  
 SI 32768  
 SF 400.2200000 MHz  
 WDW EM  
 SSB 0  
 LB 0.30 Hz  
 GB 0  
 PC 1.00

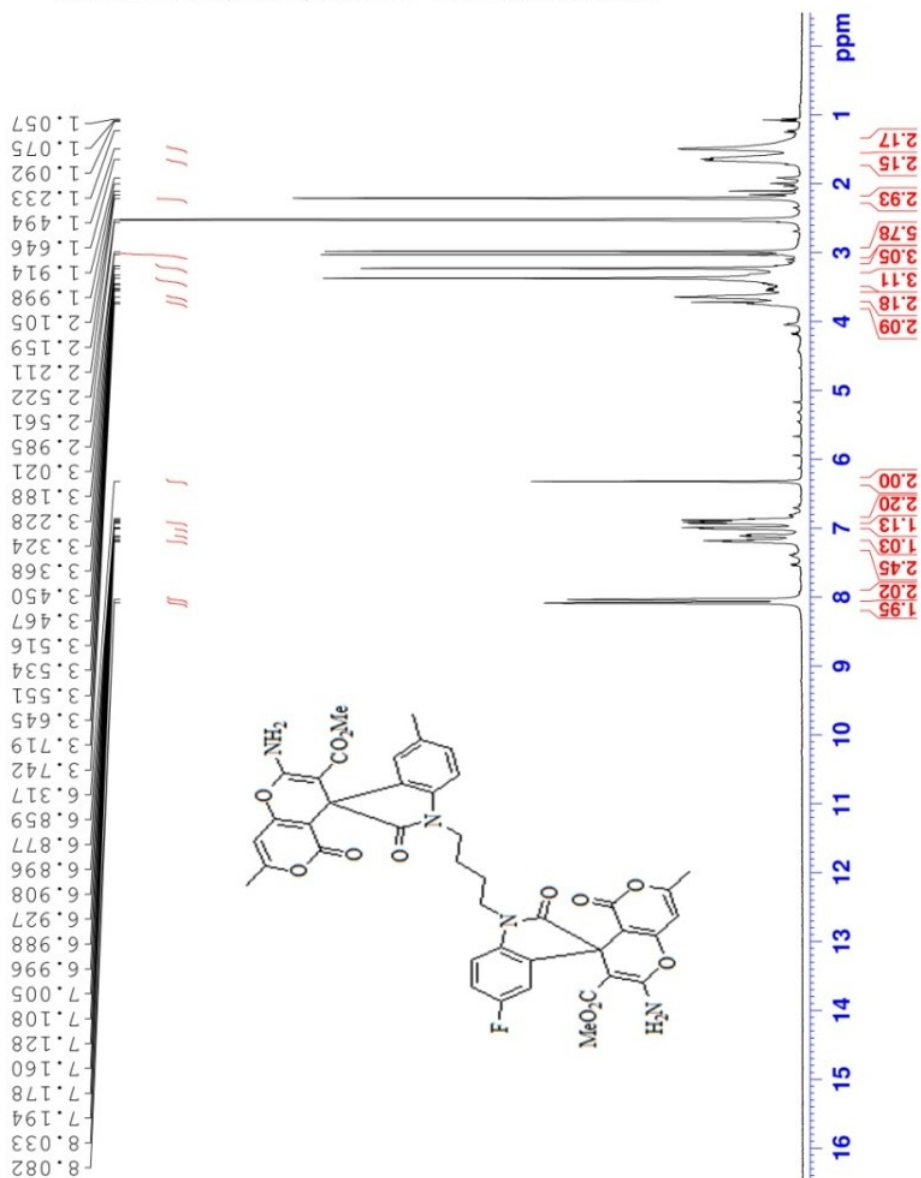

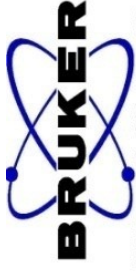

NAME: Khalij Fars UN  
 EXPNO: 2445  
 PROCNO: 1  
 Date\_: 20170718  
 Time: 16.56  
 INSTRUM: spect  
 PROBHD: 5 mm PABBO BB-  
 PULPROG: zgpg30  
 ID: 65536  
 SOLVENT: DMSO  
 NS: 904  
 DS: 0  
 SWH: 35714.285 Hz  
 FIDRES: 0.544957 Hz  
 AQ: 0.9175540 sec  
 RG: 2050  
 DW: 14.000 usec  
 DE: 6.50 usec  
 TE: 294.1 K  
 D1: 1.00000000 sec  
 D11: 0.03000000 sec  
 TD0: 1

===== CHANNEL f1 =====  
 NUC1: 13C  
 P1: 9.00 usec  
 PL1: -0.90 dB  
 PL1W: 42.02801895 W  
 SF01: 100.6479784 MHz  
 ===== CHANNEL f2 =====  
 CPDPRG2: waltz16  
 NUC2: 1H  
 PCPD2: 90.00 usec  
 PL2: -2.00 dB  
 PL12: 14.48 dB  
 PL13: 17.90 dB  
 PL12W: 11.86359406 W  
 PL13W: 0.26681873 W  
 SF02: 0.12139934 W  
 SI: 400.2216009 MHz  
 SF: 100.6353990 MHz  
 WDW: EM  
 SSB: 0  
 LB: 1.00 Hz  
 GB: 0  
 PC: 1.40

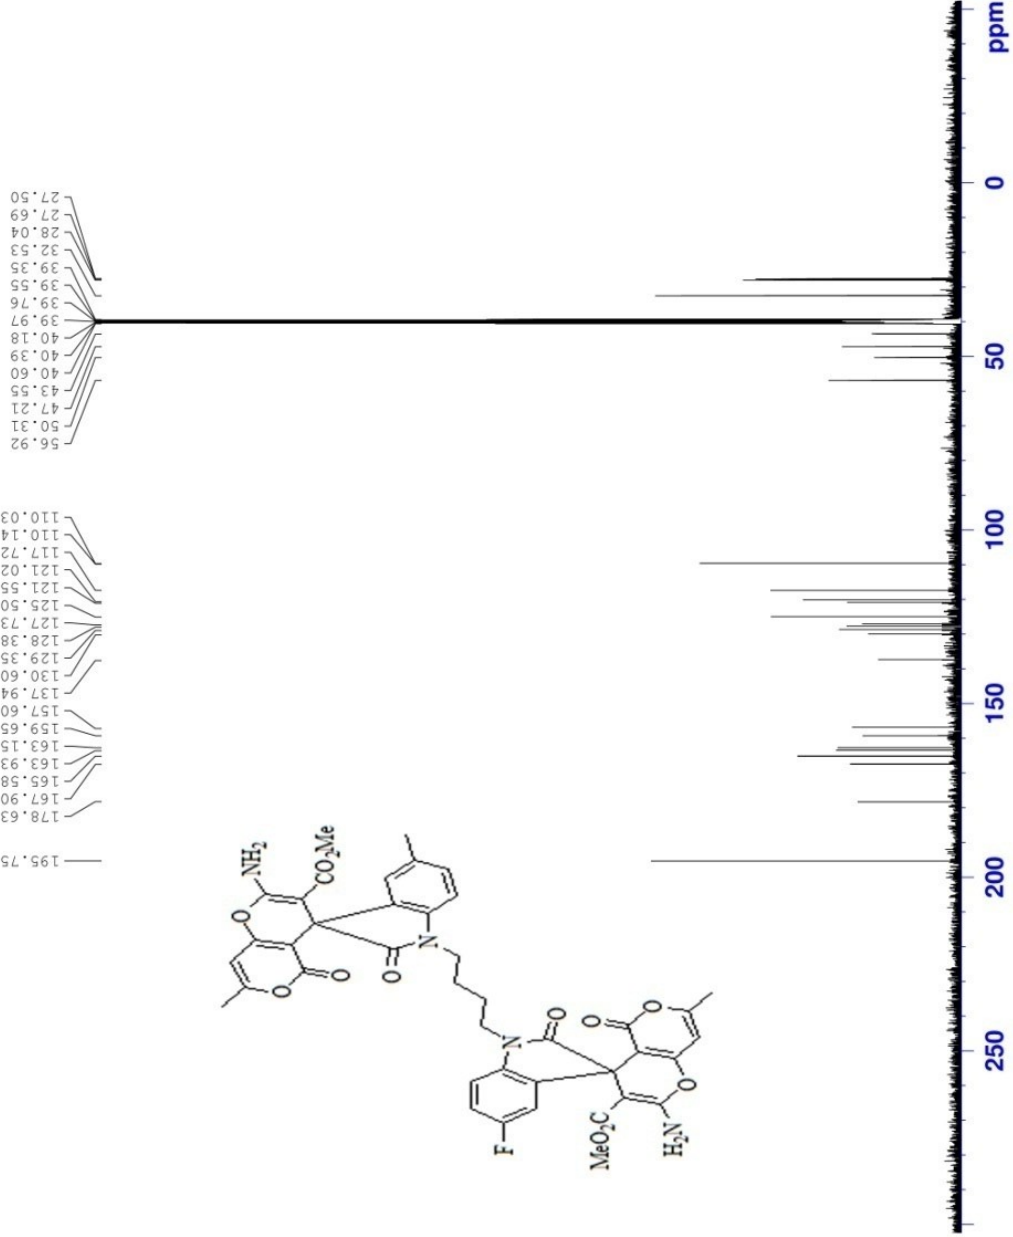



6'-amino-1-(4-(6'-amino-5'-cyano-3',5-dimethyl-2-oxo-1'H-spiro[indoline-3,4'-pyrano[2,3-c]pyrazol]-1-yl)butyl)-3'-methyl-2-oxo-1'H-spiro[indoline-3,4'-pyrano[2,3-c]pyrazole]-5'-carbonitrile **6d**

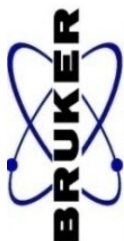

NAME Khalilij Farsi UN  
 EXPNO 2426  
 F2ACQNO 1  
 Date\_ 20170628  
 Time 13.15  
 INSTRUM Spect  
 PROBHD 5 mm PABBO BB-  
 PULPROG zg30  
 ID 65536  
 SOLVENT DMSO  
 NS 20  
 DS 0  
 SWH 8012.820 Hz  
 FIDRES 0.122266 Hz  
 AQ 4.0894966 sec  
 RG 228  
 DW 62.400 usec  
 DE 6.50 usec  
 TE 294.2 K  
 D1 4.0000000 sec  
 TD0 1

===== CHANNEL f1 =====  
 NUC1 1H  
 PL 14.00 usec  
 PL1 -2.00 dB  
 PL1W 11.86359406 W  
 SF01 400.2236020 MHz  
 ST 32768  
 SF 400.2200000 MHz  
 WDW EM  
 SSB 0  
 LB 0.30 Hz  
 GB 0  
 PC 1.00

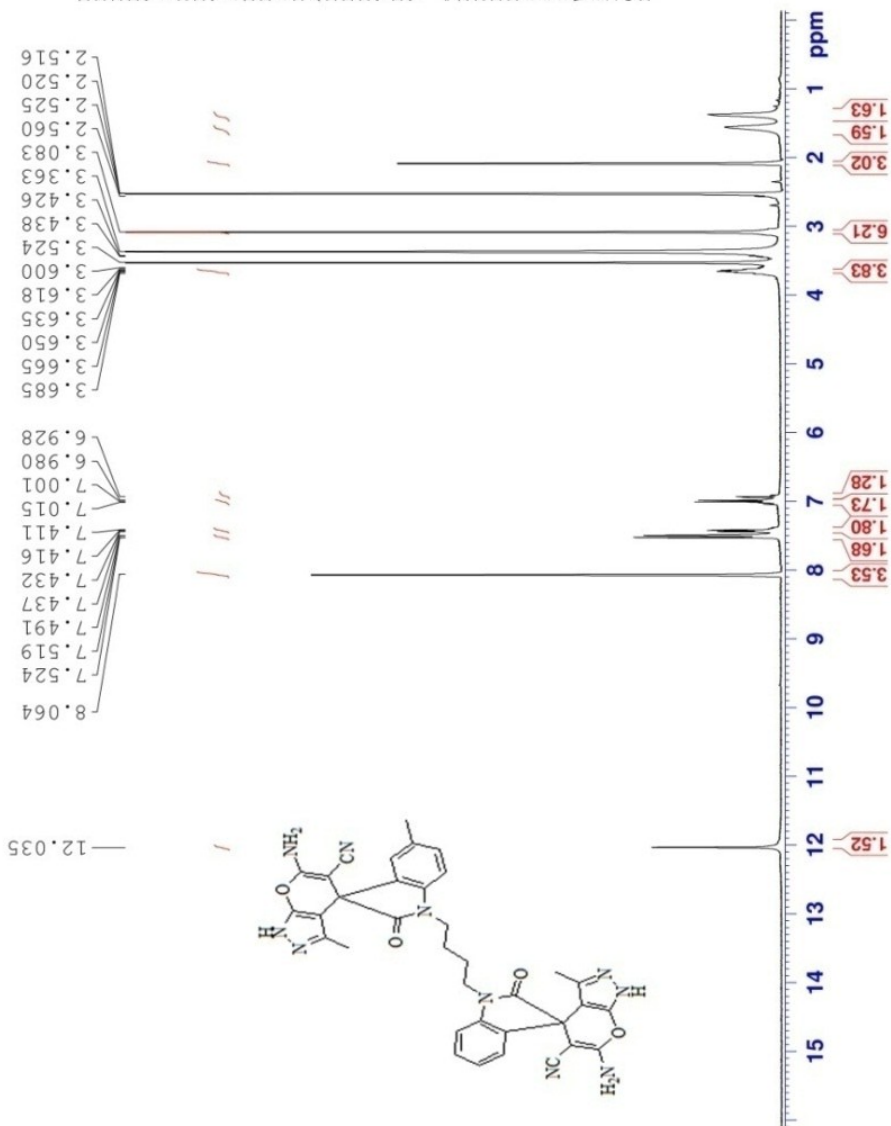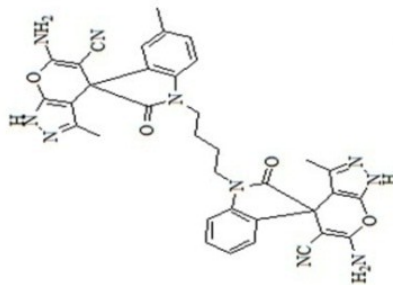

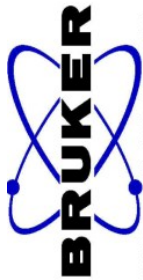

NAME: Khalij Fars UN  
 EXPNO: 2456  
 PROCNO: 1  
 Date\_: 20170719  
 Time: 17.56  
 INSTRUM: spect  
 PROBHD: 5 mm PABBO BB-  
 PULPROG: zgpg30  
 TD: 65536  
 SOLVENT: DMSO  
 NS: 6330  
 DS: 0  
 SWH: 35714.285 Hz  
 FIDRES: 0.544957 Hz  
 AQ: 0.9175540 sec  
 RG: 2050  
 DW: 14.000 usec  
 DE: 6.50 usec  
 TE: 293.4 K  
 D1: 1.00000000 sec  
 D11: 0.03000000 sec  
 TD0: 1

===== CHANNEL f1 =====  
 NUC1: 13C  
 P1: 9.00 usec  
 PL1: -0.90 dB  
 PL1W: 42.02801895 W  
 SF01: 100.6479784 MHz

===== CHANNEL f2 =====  
 CPDPRG2: waltz16  
 NUC2: 1H  
 PCPD2: 90.00 usec  
 PL2: -2.00 dB  
 PLI2: 14.48 dB  
 PLI3: 17.90 dB  
 PL2W: 11.86359406 W  
 PLI2W: 0.26681873 W  
 PLI3W: 0.12139934 W  
 SFO2: 400.2216009 MHz  
 SI: 32768  
 SF: 100.6353990 MHz  
 WDW: EM  
 SSB: 0  
 LB: 1.00 Hz  
 GB: 0  
 PC: 1.40

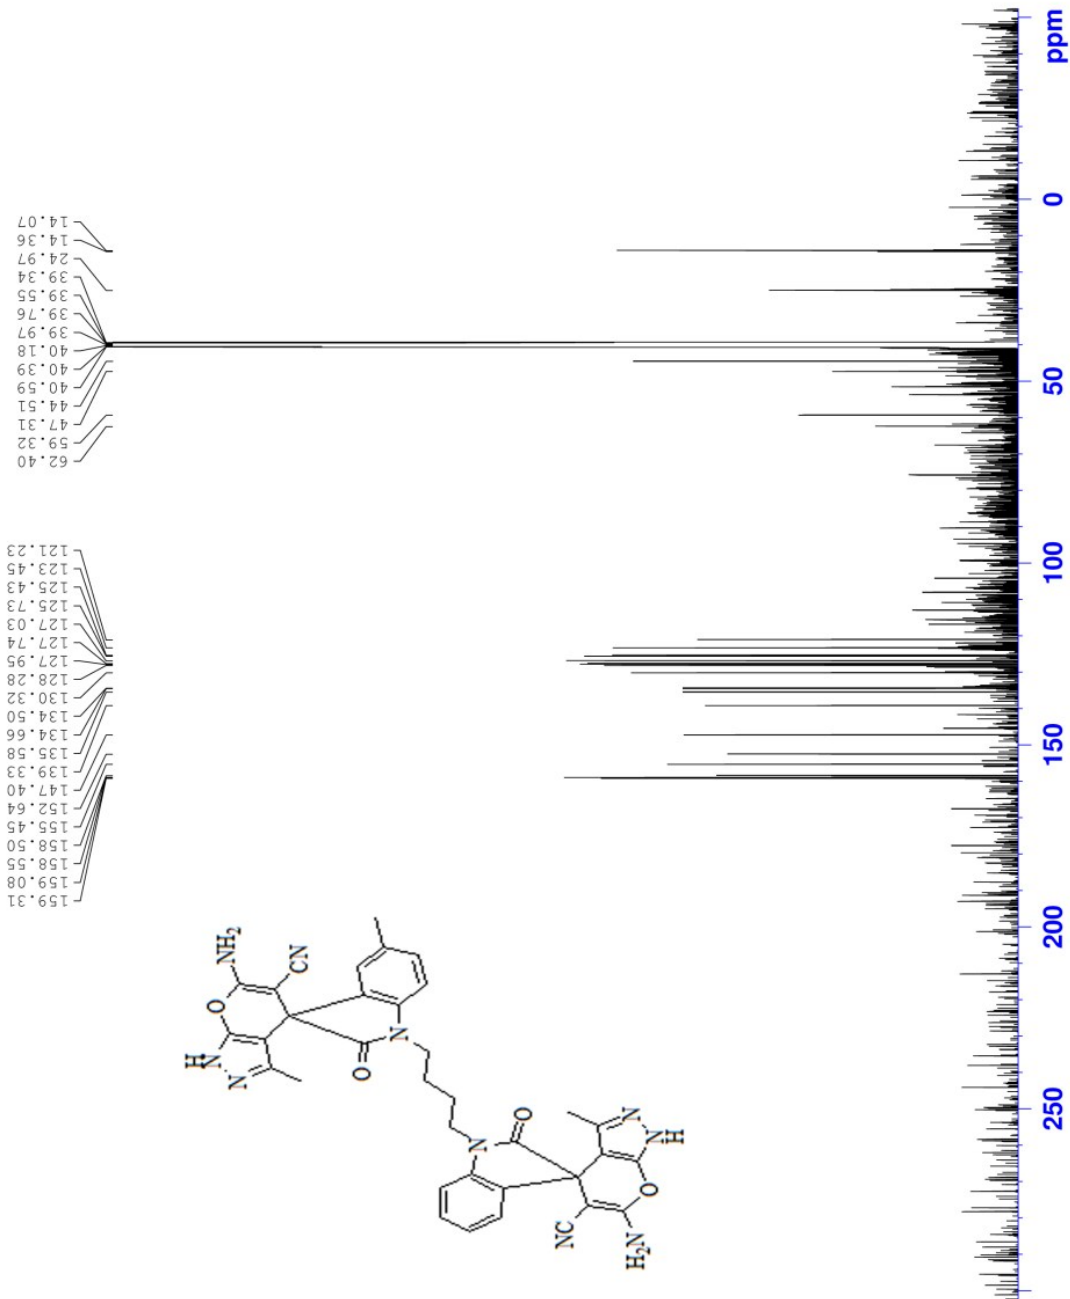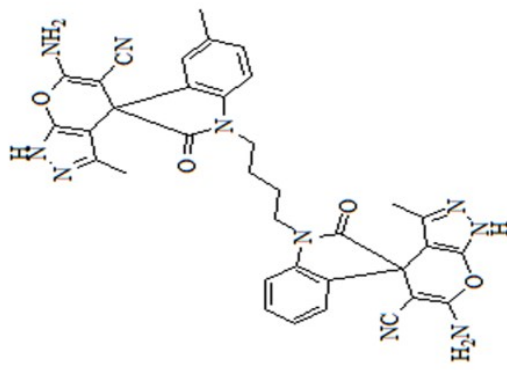



6'-amino-1-(4-(((6'-amino-5'-cyano-5-methyl-2-oxo-3'-propyl-1'H-spiro[indoline-3,4'-pyrano[2,3-c]pyrazol]-1-yl)methyl)benzyl)-5-bromo-2-oxo-3'-propyl-1'H-spiro[indoline-3,4'-pyrano[2,3-c]pyrazole]-5'-carbonitrile) **6e**

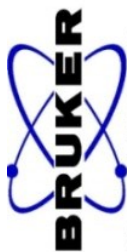

NAME Khaliq Fares UN  
 EXPNO 2425  
 PROCNO 1  
 Date\_ 20170628  
 Time 13.05  
 INSTRUM spect  
 PROBD 5 mm PABBO BB-  
 PULPROG zg30  
 TD 65536  
 SOLVENT DMSO  
 NS 20  
 DS 0  
 SWH 8012.820 Hz  
 FIDRES 0.122266 Hz  
 AQ 4.0894966 sec  
 RG 228  
 DW 62.400 usec  
 DE 6.50 usec  
 TE 294.1 K  
 D1 4.00000000 sec  
 TD0 1

CHANNEL f1  
 NUC1 1H  
 P1 14.00 usec  
 PL1 -2.00 dB  
 PL1W 11.86359406 W  
 SFO1 400.2236020 MHz  
 SI 32768  
 SF 400.2200000 MHz  
 MDW EM  
 SSB 0  
 LB 0.30 Hz  
 GB 0  
 PC 1.00

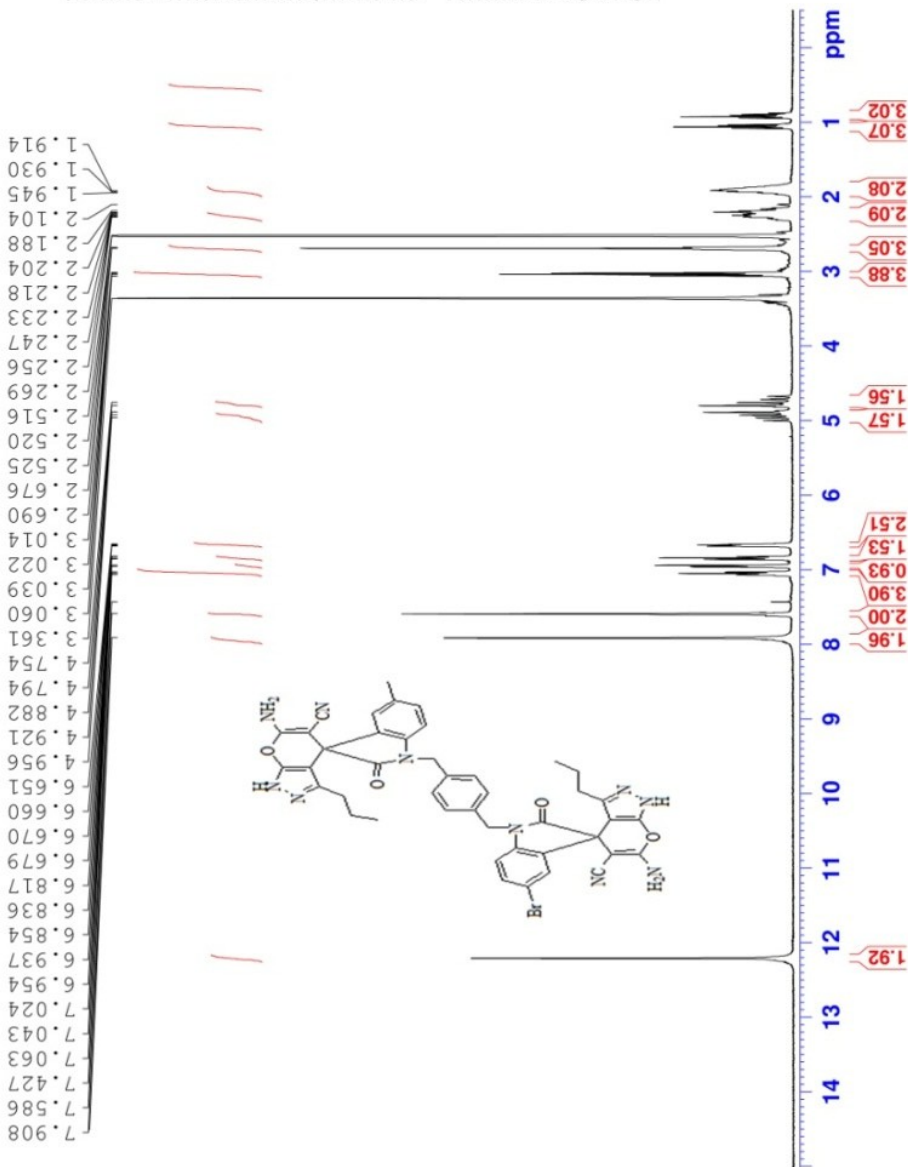

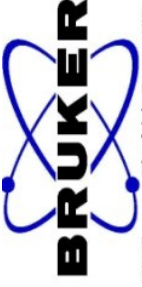

NAME Khallij Fars UN  
EXPNO 2458  
PROCNO 1  
Date\_ 20170722  
Time 15.18  
INSTRUM spect  
PROBHD 5 mm PABBO BB-  
PULPROG zgpg30  
TD 65536  
SOLVENT DMSO  
NS 4400  
DS 0  
SWH 35714.285 Hz  
FIDRES 0.544957 Hz  
AQ 0.9175540 sec  
RG 2050  
DW 14.000 usec  
DE 6.50 usec  
TE 295.1 K  
D1 1.00000000 sec  
D11 0.03000000 sec  
TD0 1

=====  
CHANNEL f1  
NUC1 13C  
P1 9.00 usec  
PL1 -0.90 dB  
PL1W 42.02801895 W  
SFO1 100.6479784 MHz

=====  
CHANNEL f2  
CPDPRG2 waltz16  
NUC2 1H  
PCPD2 90.00 usec  
PL2 -2.00 dB  
PL12 14.48 dB  
PL13 17.90 dB  
PL2W 11.86359406 W  
PL12W 0.26681873 W  
PL13W 0.12139934 W  
SFO2 400.2216009 MHz  
SI 32768  
SF 100.6353990 MHz  
WDW EM  
SSB 0  
LB 1.00 Hz  
GB 0  
PC 1.40

179.29  
179.18  
168.89  
168.82  
161.23  
161.19  
161.15  
144.95  
142.59  
137.63  
137.46  
136.21  
136.19  
133.91  
130.92  
130.74  
129.57  
126.12  
125.57  
124.94  
119.68  
119.57  
114.01  
113.95  
76.58  
62.40  
59.04  
51.06  
46.60  
44.98  
40.60  
40.39  
39.98  
39.77  
39.56  
39.35  
32.06  
28.31  
27.11  
24.97  
14.36  
14.12

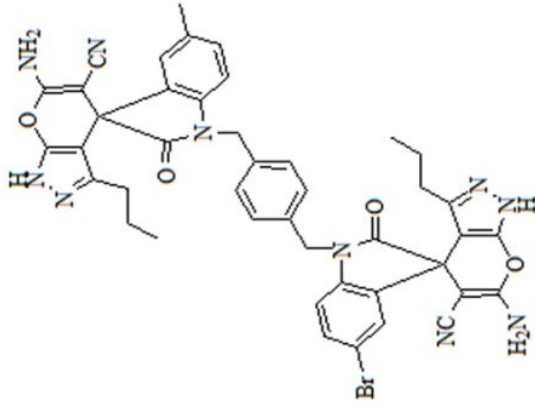

ppm 0 50 100 150 200 250

methyl 2'-amino-1-(6-(2'-amino-3'-(methoxycarbonyl)-5,7'-dimethyl-2,5'-dioxo-5'H-spiro[indoline-3,4'-pyrano[4,3-b]pyran]-1-yl)hexyl)-5-bromo-7'-methyl-2,5'-dioxo-5'H-spiro[indoline-3,4'-pyrano[4,3-b]pyran]-3'-carboxylate **6f**

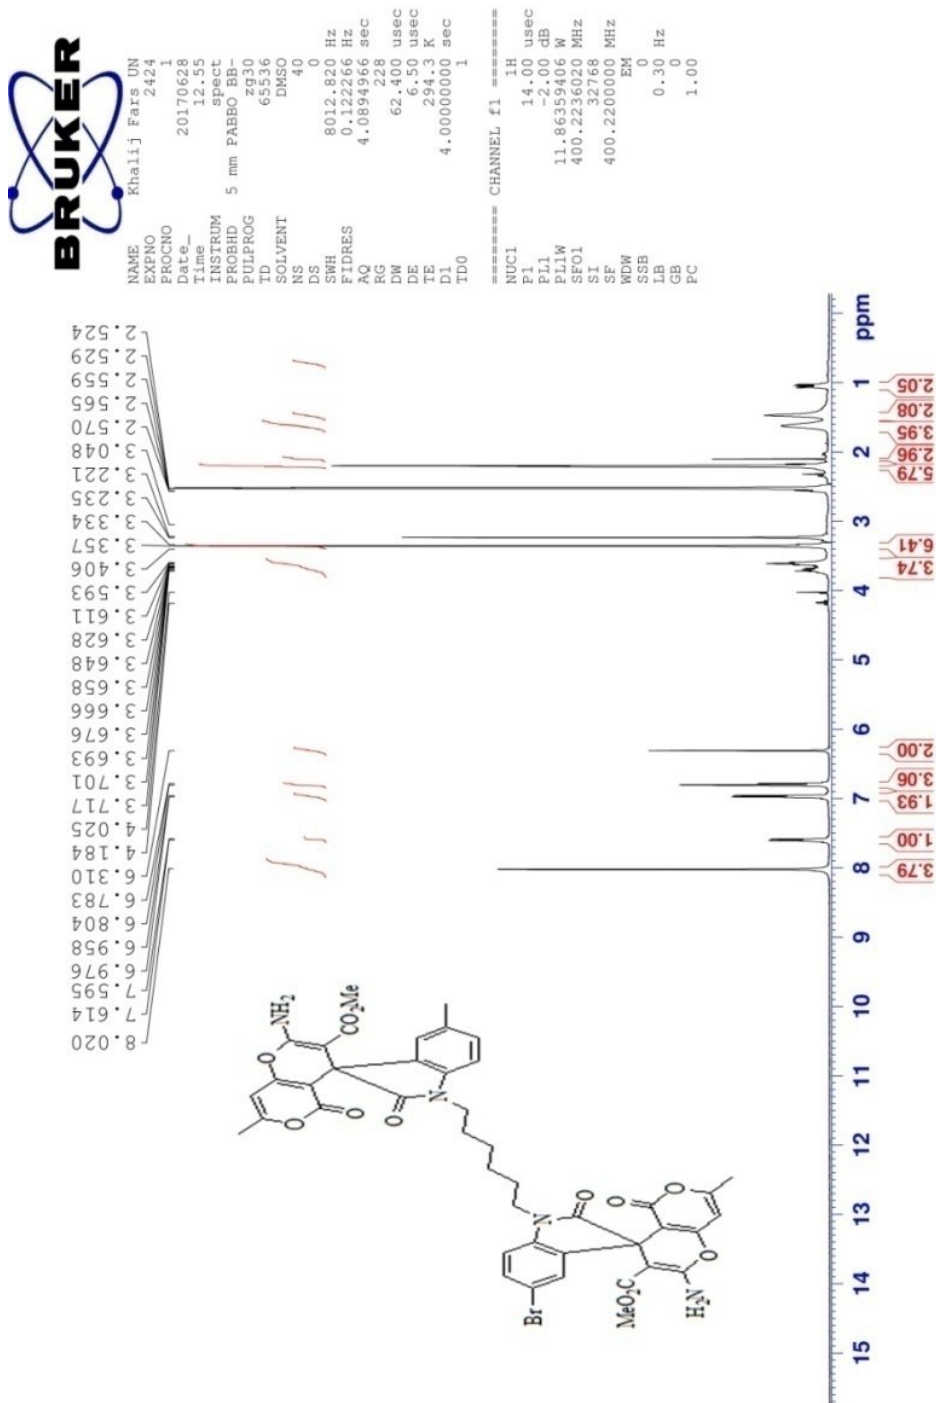

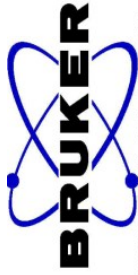

NAME: Khaliq Fars UN  
EXPNO: 2453  
PROCNO: 1  
Date\_ Time: 20170719 11.09  
INSTRUM: spect  
PROBHD: 5 mm PABBO BB-  
PULPROG: zgpg30  
TD: 65536  
SOLVENT: DMSO  
NS: 991  
DS: 0  
SWH: 35714.285 Hz  
FIDRES: 0.544957 Hz  
AQ: 0.9175540 sec  
RG: 2050  
DW: 14.000 usec  
DE: 6.50 usec  
TE: 293.4 K  
D1: 1.00000000 sec  
D11: 0.03000000 sec  
TDO: 1

=====  
CHANNEL f1  
NUC1: 13C  
P1: 9.00 usec  
PL1: -0.90 dB  
PL1W: 42.02801895 W  
SF01: 100.6479784 MHz

=====  
CHANNEL f2  
CFDPRG2: waltz16  
NUC2: 1H  
PCPD2: 90.00 usec  
PL2: -2.00 dB  
PL12: 14.48 dB  
PL13: 17.90 dB  
PL2W: 11.86359406 W  
PL12W: 0.26681873 W  
PL13W: 0.12139934 W  
SF02: 400.2216009 MHz  
SI: 32768  
SF: 100.6353990 MHz  
WDW: EM  
SSB: 0  
LB: 1.00 Hz  
GB: 0  
PC: 1.40

174.59  
171.15  
171.10  
170.28  
167.42  
164.71  
159.49  
149.40  
149.13  
147.44  
146.74  
146.41  
142.55  
140.18  
139.91  
138.93  
137.77  
137.73  
135.44  
133.26  
130.42  
129.56  
129.26  
128.12  
125.02  
114.18  
76.00  
59.30  
50.89  
46.55  
40.59  
40.38  
40.17  
39.96  
39.76  
39.55  
39.34  
27.37  
26.70  
21.03  
19.61  
14.04

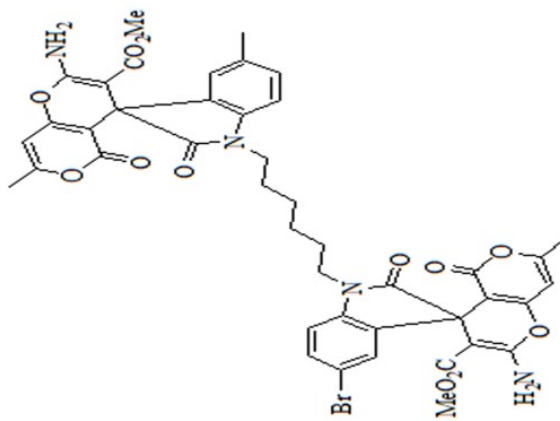

250 200 150 100 50 0 ppm

2'-amino-1-(4-(2'-amino-3'-cyano-5,7'-dimethyl-2,5'-dioxo-5'H-spiro[indoline-3,4'-pyrano[4,3-b]pyran]-1-yl)butyl)-7'-methyl-2,5'-dioxo-5'H-spiro[indoline-3,4'-pyrano[4,3-b]pyran]-3'-carbonitrile **6g**

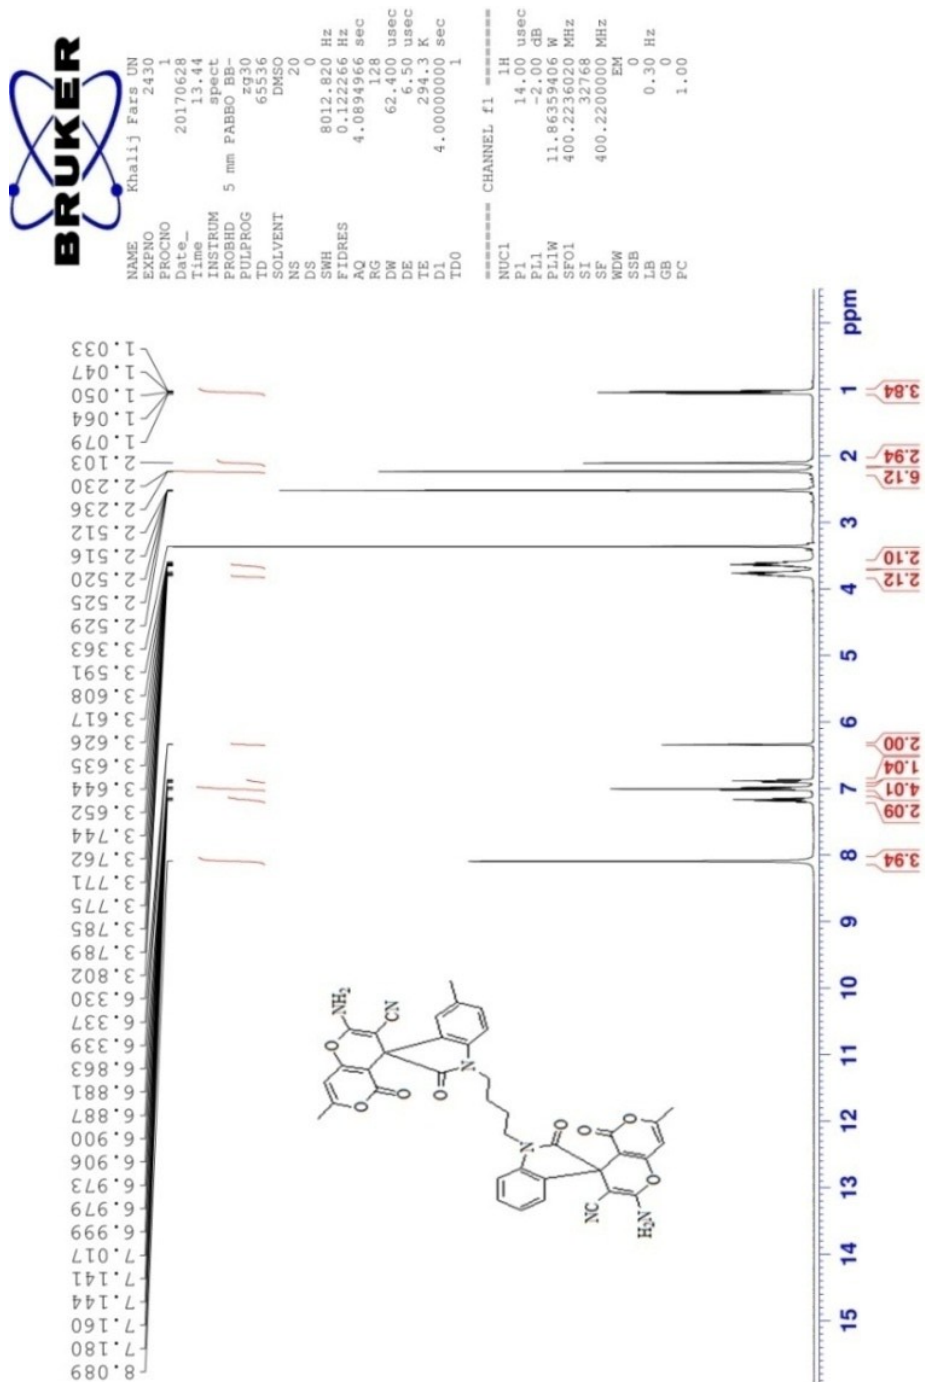







Sample solubility was too low for <sup>13</sup>C-NMR even after heating.

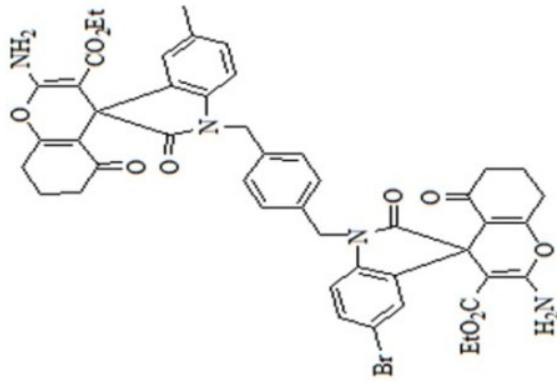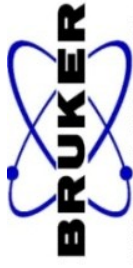

NAME Khalij Fars UN  
 EXPNO 1  
 PROCNO 2455  
 Date\_ 20170719  
 Time 13.51  
 INSTRUM spect  
 PROBHD 5 mm PABBO BB-  
 PULPROG zgpg30  
 ID 65536  
 SOLVENT DMSO  
 NS 1598  
 DS 0  
 SWH 35714.285 Hz  
 FIDRES 0.544957 Hz  
 AQ 0.9175540 sec  
 RG 2050  
 DW 14.000 usec  
 DE 6.50 usec  
 TE 293.8 K  
 D1 1.00000000 sec  
 D11 0.03000000 sec  
 TD0 1

===== CHANNEL f1 =====  
 NUC1 <sup>13</sup>C  
 P1 9.00 usec  
 PL1 -0.90 dB  
 PL1W 42.02801895 W  
 SF01 100.6479784 MHz

===== CHANNEL f2 =====  
 CPDPRG2 waltz16  
 NUC2 <sup>1</sup>H  
 FCPD2 90.00 usec  
 PL2 -2.00 dB  
 PL12 14.48 dB  
 PL13 17.90 dB  
 PL2W 11.86359406 W  
 PL12W 0.26681873 W  
 PL13W 0.12139934 W  
 SF02 400.2216009 MHz  
 SI 32766  
 SF 100.6353990 MHz  
 WDW EM  
 SSB 0  
 LB 1.00 Hz  
 GB 0  
 PC 1.40

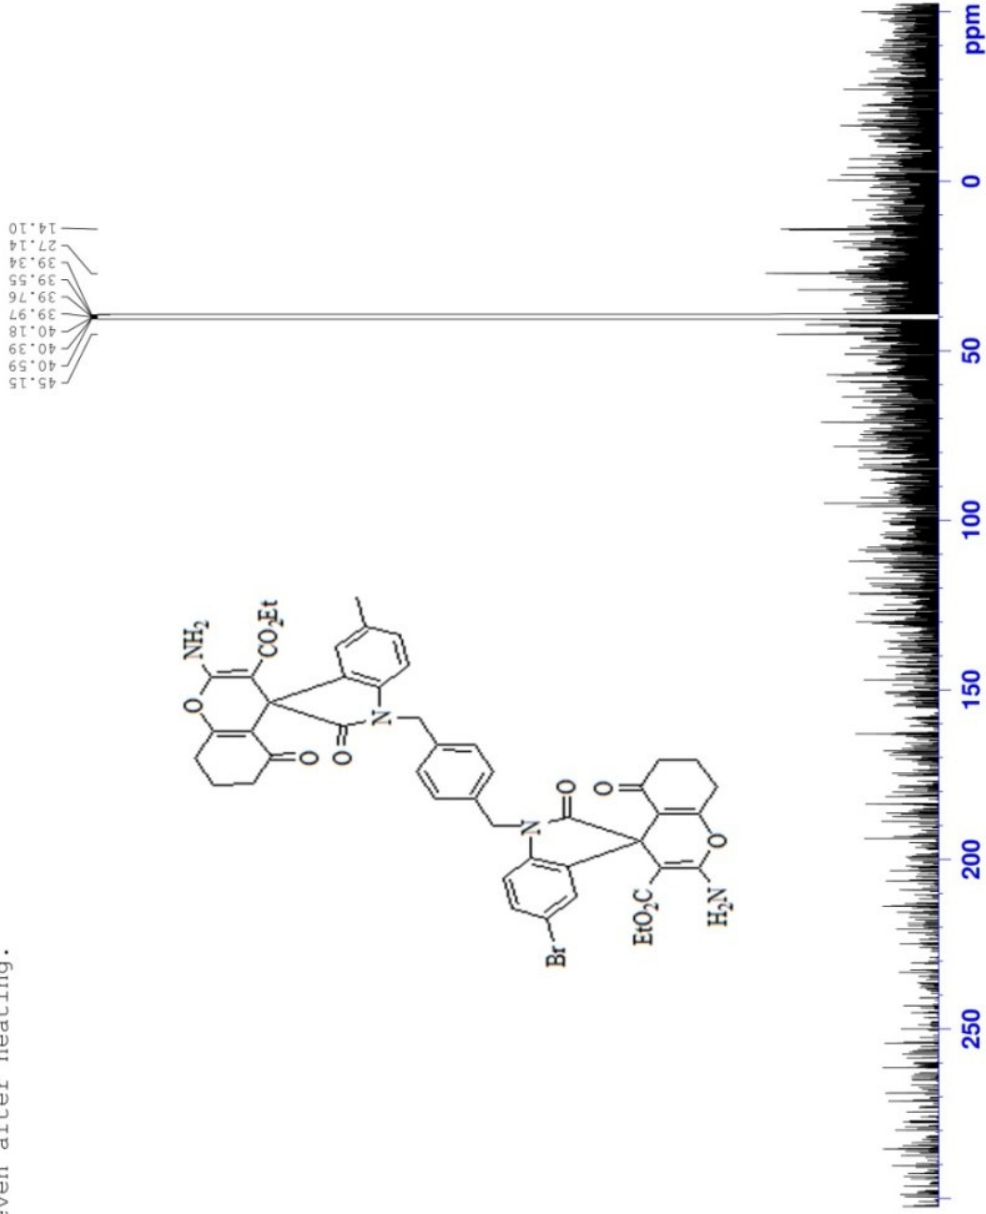

2-amino-1'-(4-((2-amino-3-cyano-5',7,7-trimethyl-2',5-dioxo-5,6,7,8-tetrahydrospiro[chromene-4,3'-indolin]-1'-yl)methyl)benzyl)-5'-chloro-7,7-dimethyl-2',5-dioxo-5,6,7,8-tetrahydrospiro[chromene-4,3'-indoline]-3-carbonitrile **6i**

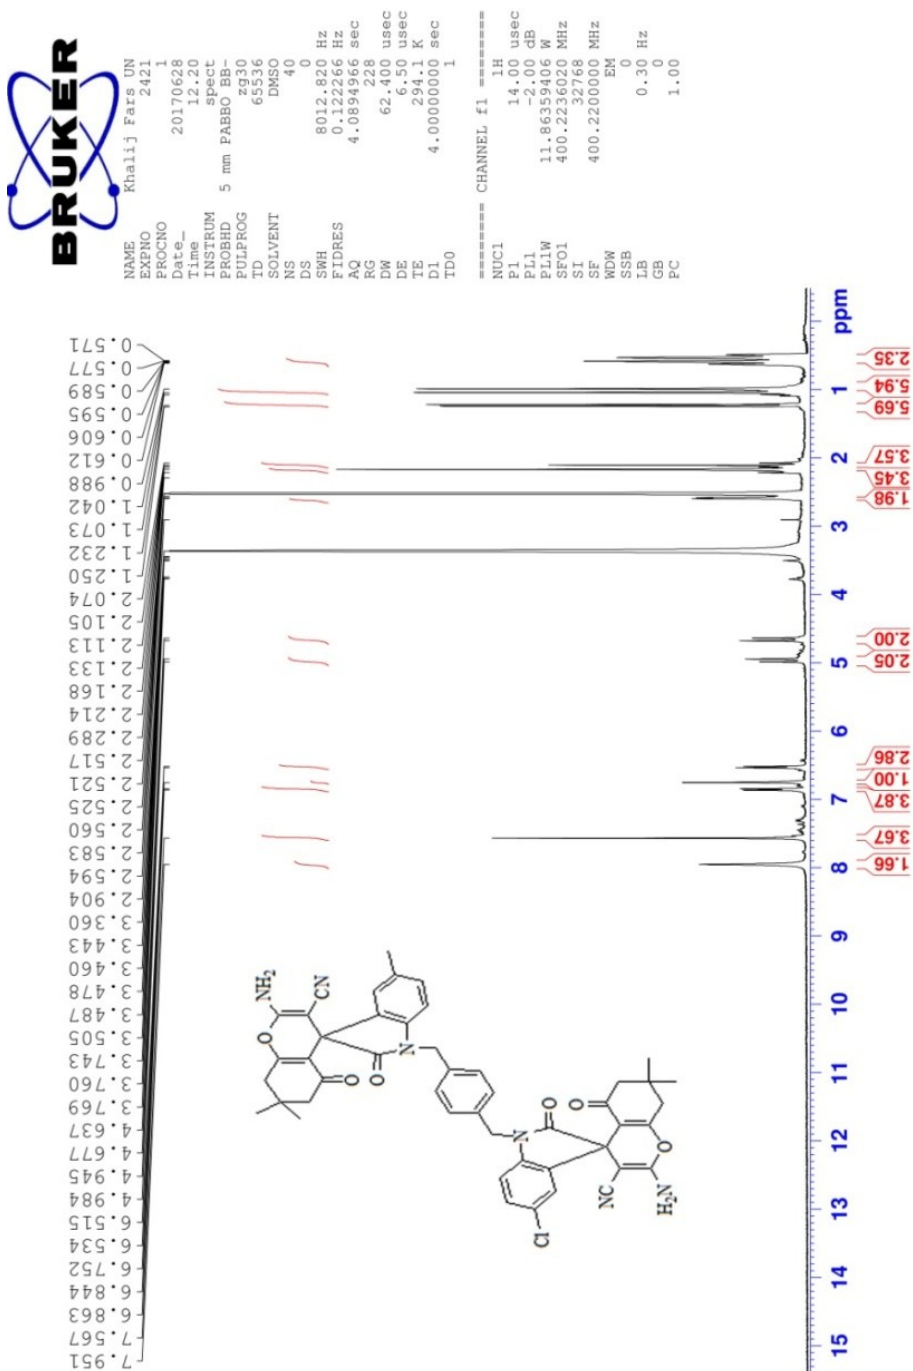

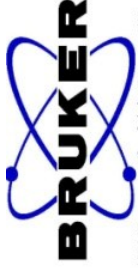

```

NAME      Khaliij Fars UN
EXPNO     1
PROCNO    1
Date_     20170718
Time      17.34
INSTRUM   spect
PROBHD    5 mm PABBO BB-
PULPROG   zgpg30
TD         65536
SOLVENT   DMSO
NS         708
DS         0
SWH        35714.285 Hz
FIDRES     0.544957 Hz
AQ         0.9175540 sec
RG         2050
DE         14.000 usec
TE         294.1 K
D1         1.00000000 sec
D11        0.03000000 sec
TD0        1

===== CHANNEL f1 =====
NUC1       13C
P1         9.00 usec
PL1        -0.90 dB
PL1W       42.02801895 W
SFO1       100.6479784 MHz

===== CHANNEL f2 =====
CPDPRG2   waltz16
NUC2       1H
P2         90.00 usec
PL2        -2.00 dB
PL12       14.48 dB
PL13       17.90 dB
PL2W       11.86359406 W
PL12W      0.26681873 W
PL13W      0.12139934 W
SFO2       400.2216009 MHz
SI         32768
SF         100.6353990 MHz
WDW        EM
SSB        0
LB         1.00 Hz
GB         0
PC         1.40
  
```

192.54  
192.54  
177.27  
177.16  
166.88  
166.83  
159.23  
159.22  
159.19  
143.01  
140.64  
135.63  
135.43  
134.21  
134.18  
131.99  
128.92  
128.78  
127.55  
124.21  
123.57  
122.99  
117.93  
117.88  
112.28  
112.20  
109.33  
109.33  
109.09  
70.33  
57.95  
57.73  
47.17  
47.11  
43.54  
40.60  
40.39  
40.18  
39.97  
39.77  
39.56  
39.39  
36.67  
31.23  
27.32  
21.22  
20.20  
11.33  
10.43

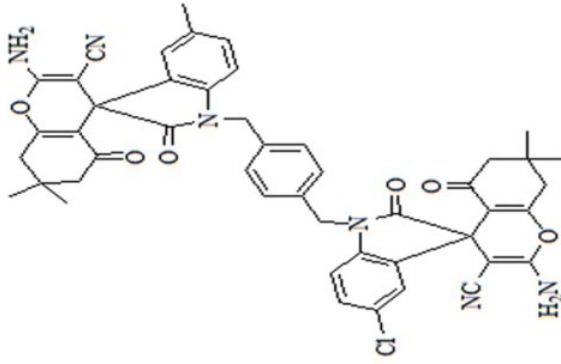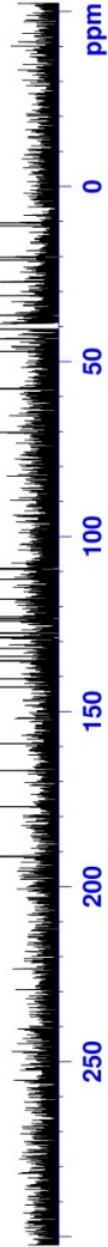

ethyl 2-amino-1'-(4-((2-amino-3-(ethoxycarbonyl)-5',7,7-trimethyl-2',5-dioxo-5,6,7,8-tetrahydrospiro[chromene-4,3'-indolin]-1'-yl)methyl)benzyl)-5'-bromo-7,7-dimethyl-2',5-dioxo-5,6,7,8-tetrahydrospiro[chromene-4,3'-indoline]-3-carboxylate **6j**

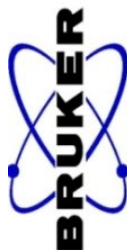

NAME Khallij Fars UN  
 EXPNO 1  
 PROCNO 2420  
 Date\_ 20170628  
 Time 12.13  
 INSTRUM spect  
 PROBHD 5 mm PABBO BB-  
 PULPROG zg30  
 TD 65536  
 SOLVENT DMSO  
 NS 20  
 DS 0  
 SWH 8012.820 Hz  
 FIDRES 0.122266 Hz  
 AQ 4.0894966 sec  
 RG 228  
 DW 62.400 usec  
 DE 6.50 usec  
 TE 294.3 K  
 D1 4.0000000 sec  
 TD0 1  
 ===== CHANNEL f1 =====  
 NUC1 1H  
 P1 14.00 usec  
 PL1 -2.00 dB  
 PLLW 11.86359406 W  
 SF01 400.2236020 MHz  
 SI 32768  
 SF 400.2200000 MHz  
 WDW EM  
 SSB 0  
 LB 0.30 Hz  
 GB 0  
 PC 1.00

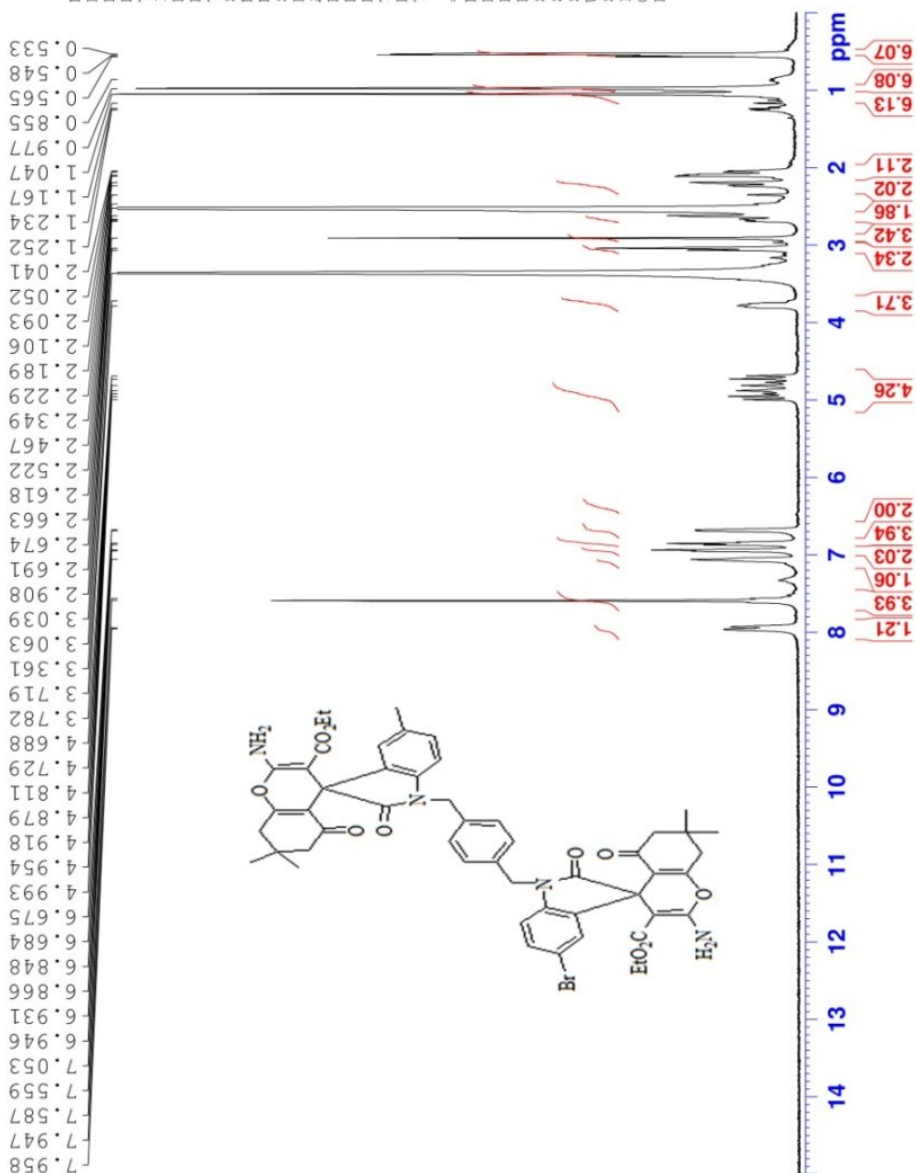

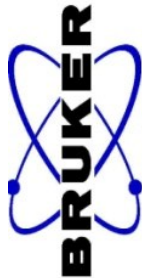

NAME Khaliq Fars UN  
 EXPNO 1  
 PROCNO 2451  
 Date\_ 20170719  
 Time 8.33  
 INSTRUM spect  
 PROBHD 5 mm PABBO BB-  
 PULPROG zgpg30  
 TD 65536  
 SOLVENT DMSO  
 NS 1302  
 DS 0  
 SWH 35714.285 Hz  
 FIDRES 0.544957 Hz  
 AQ 0.9175540 sec  
 RG 2050  
 DW 14.000 usec  
 DE 6.50 usec  
 TE 293.1 K  
 D1 1.00000000 sec  
 D11 0.03000000 sec  
 TD0 1

===== CHANNEL f1 =====  
 NUC1 13C  
 P1 9.00 usec  
 PL1 -0.90 dB  
 PL1W 42.02801895 W  
 SF01 100.6479784 MHz

===== CHANNEL f2 =====  
 CPDPRG2 waltz16  
 NUC2 1H  
 PCPD2 90.00 usec  
 PL2 -2.00 dB  
 PLI2 14.48 dB  
 PLI3 17.90 dB  
 PL2W 11.86359406 W  
 PL12W 0.26681873 W  
 PL13W 0.12139934 W  
 SFO2 400.2216009 MHz  
 SI 32768  
 SF 100.6353990 MHz  
 WDW EM  
 SSB 0  
 LB 1.00 Hz  
 GB 0  
 PC 1.40

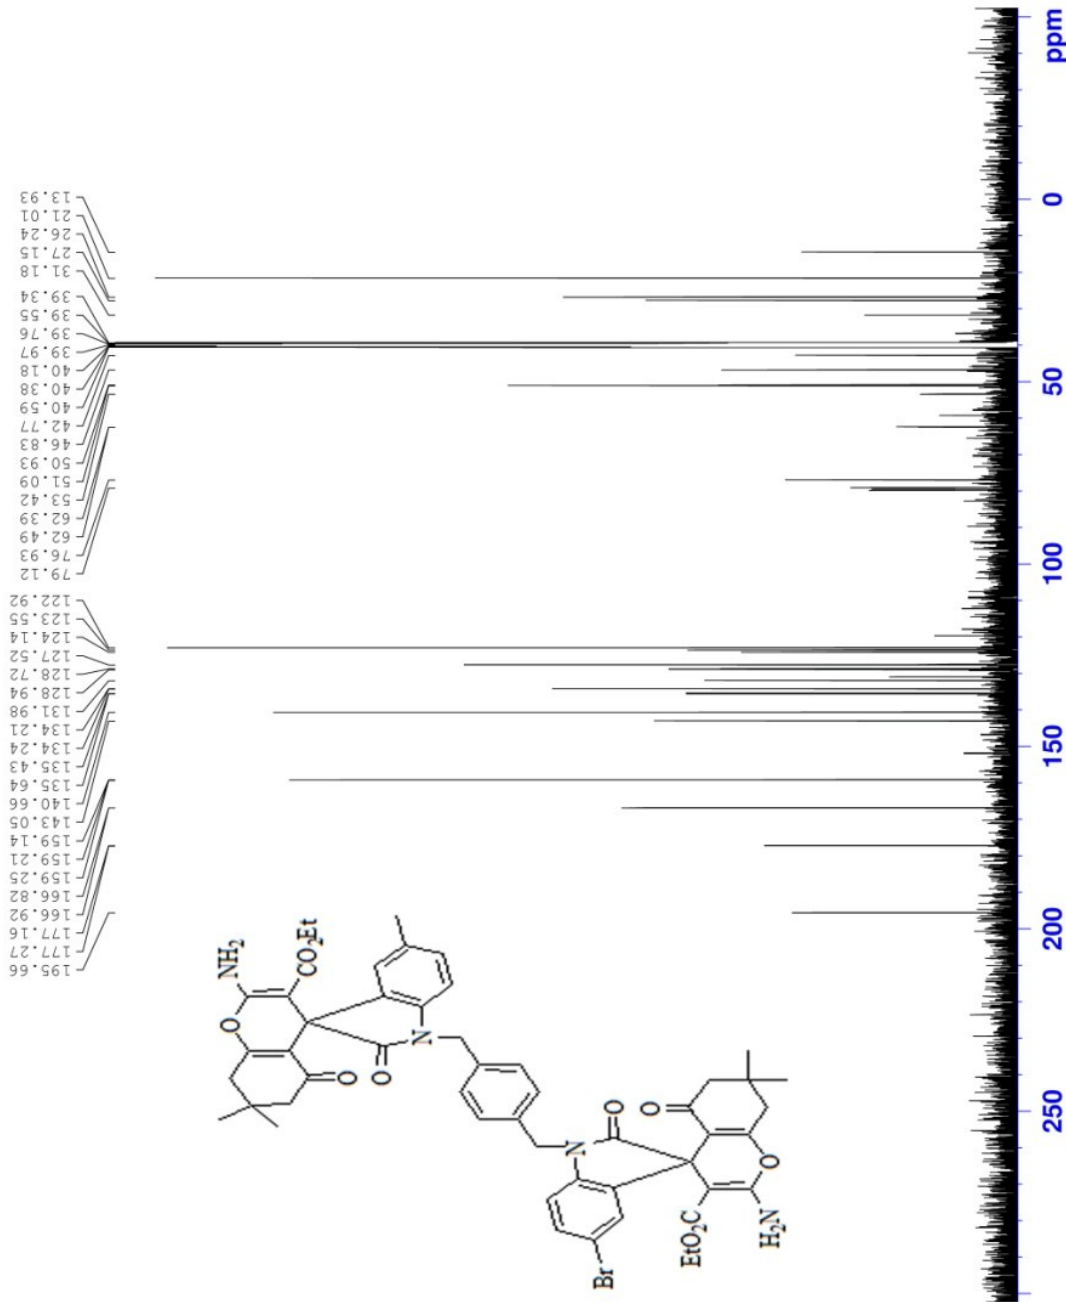



methyl 2'-amino-1-(4-(2'-amino-3'-(methoxycarbonyl)-5-methyl-2,5'-dioxo-5'H-spiro[indoline-3,4'-pyrano[3,2-c]chromen]-1-yl)butyl)-5-bromo-2,5'-dioxo-5'H-spiro[indoline-3,4'-pyrano[3,2-c]chromene]-3'-carboxylate **6k**

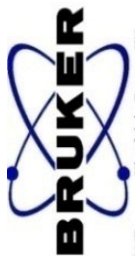

NAME Khalij Fars UN  
 EXPNO 2419  
 PROCNO 1  
 Date\_ 20170628  
 Time\_ 12.06  
 INSTRUM spect  
 PROBHID 5 mm PABBO BB-  
 PULPROG zg30  
 ID 65536  
 SOLVENT DMSO  
 NS 20  
 DS 0  
 SWH 8012.820 Hz  
 FIDRES 0.122266 Hz  
 AQ 4.0894966 sec  
 RG 228  
 DW 62.400 usec  
 DE 6.50 usec  
 TE 294.3 K  
 D1 4.0000000 sec  
 TD0 1  
 ===== CHANNEL f1 =====  
 NUC1 1H  
 P1 14.00 usec  
 PL1 -2.00 dB  
 PL1W 11.86359406 W  
 SF01 400.2236020 MHz  
 SI 32768  
 SF 400.2200000 MHz  
 WDW EM  
 SSB 0  
 LB 0.30 Hz  
 GB 0  
 PC 1.00

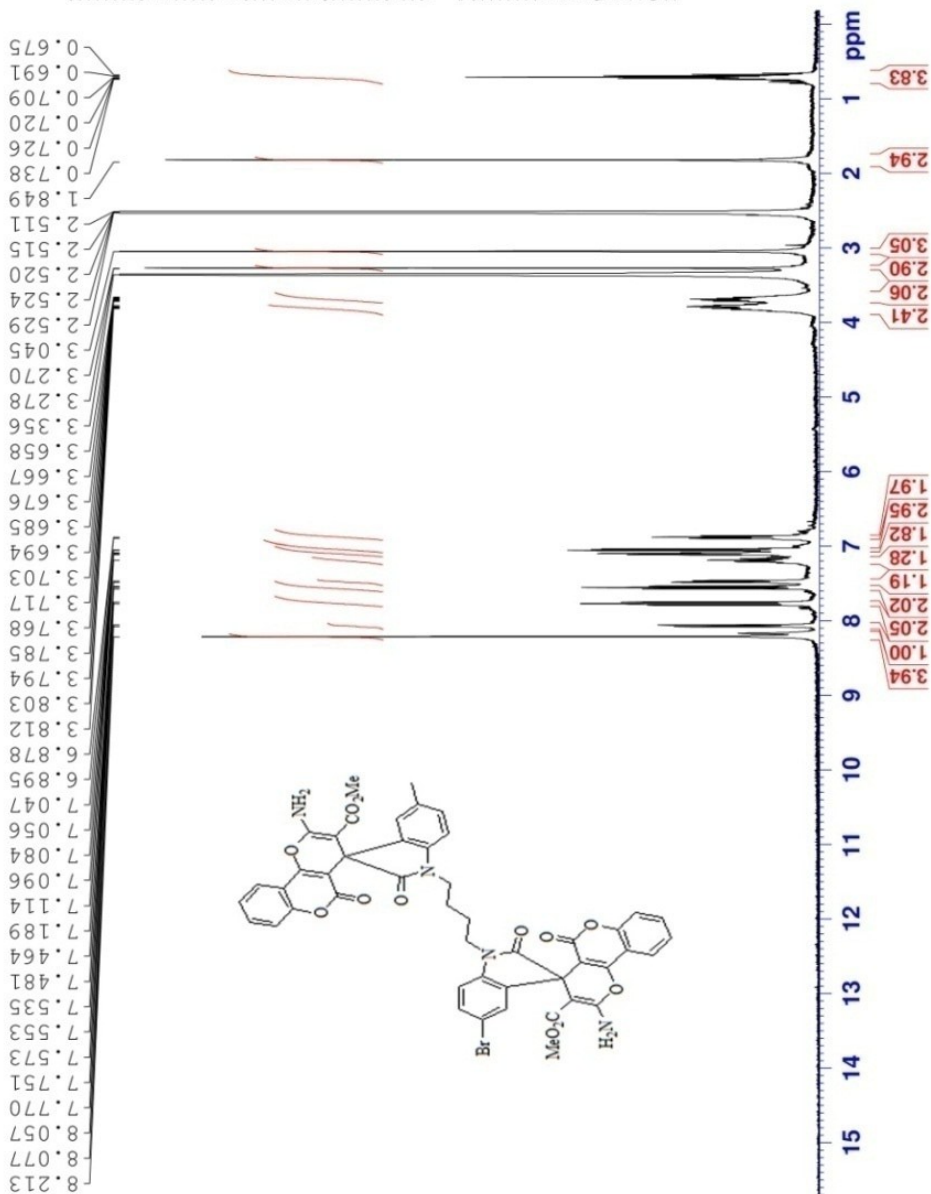



ethyl 6'-amino-1-(4-(6'-amino-5'-(ethoxycarbonyl)-3',5-dimethyl-2-oxo-1'H-spiro[indoline-3,4'-pyrano[2,3-c]pyrazol]-1-yl)butyl)-3'-methyl-2-oxo-1'H-spiro[indoline-3,4'-pyrano[2,3-c]pyrazole]-5'-carboxylate **6l**

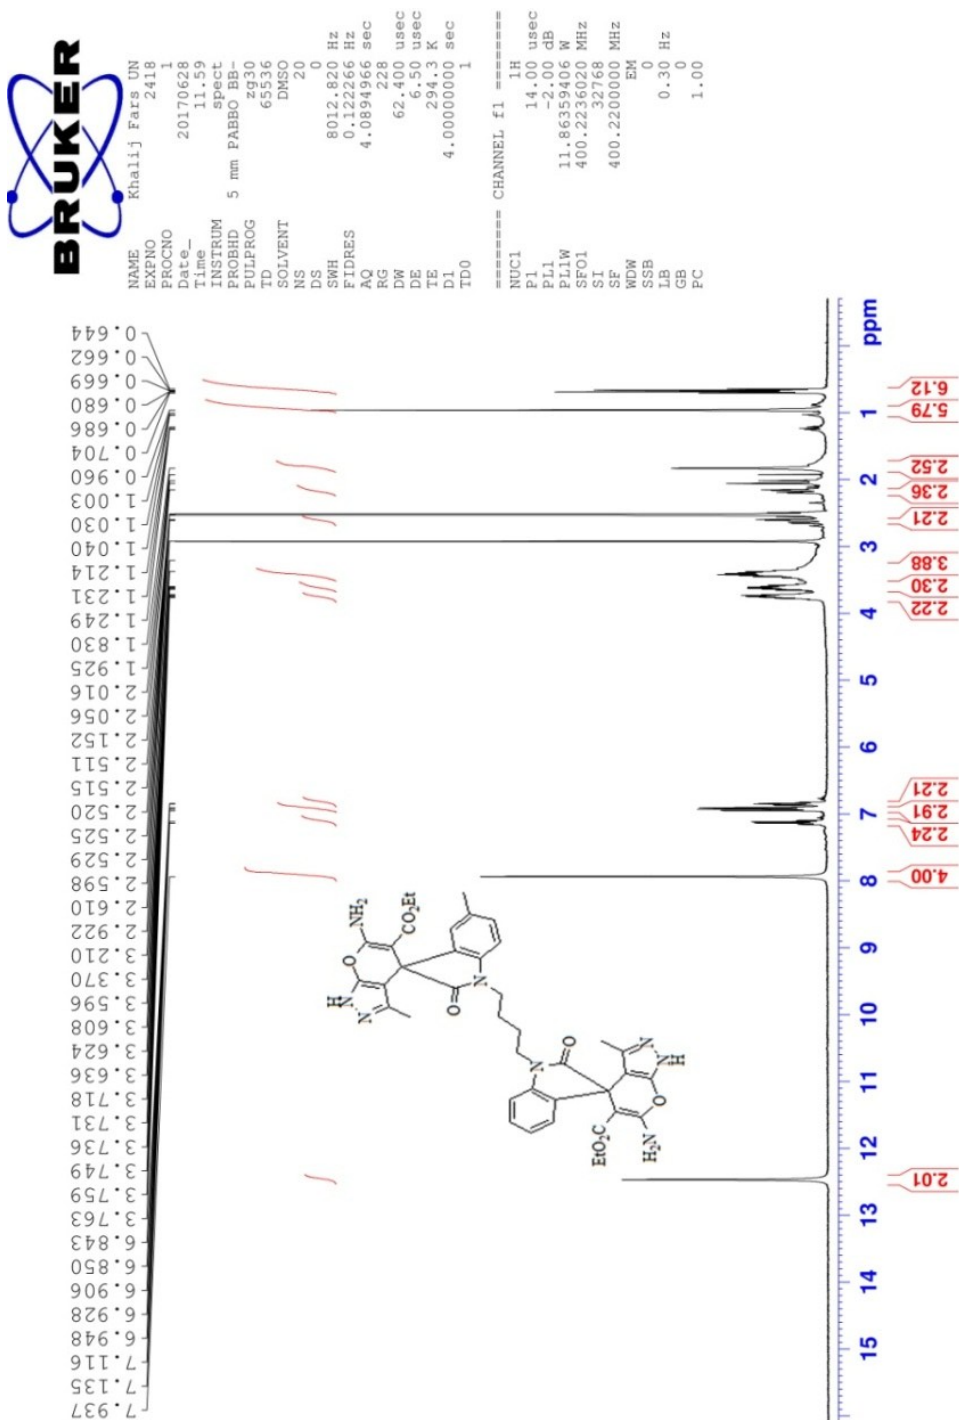



methyl 2-amino-1'-(6-(2-amino-3-(methoxycarbonyl)-5',7,7-trimethyl-2',5-dioxo-5,6,7,8-tetrahydrospiro[chromene-4,3'-indolin]-1'-yl)hexyl)-7,7-dimethyl-2',5-dioxo-5,6,7,8-tetrahydrospiro[chromene-4,3'-indoline]-3-carboxylate **6m**

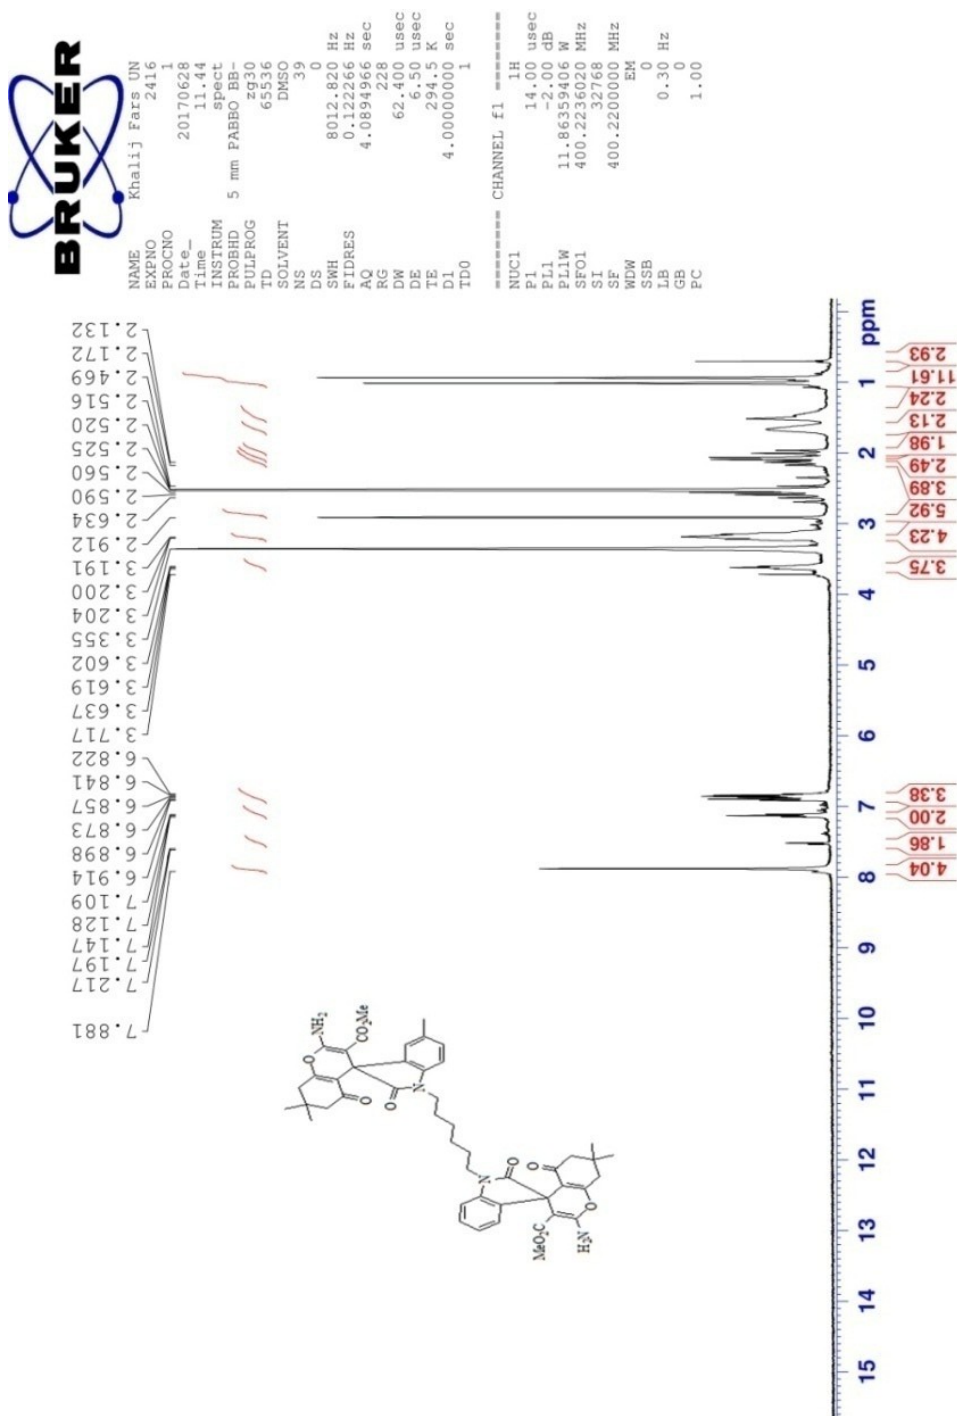

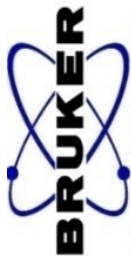

NAME: Khalij Fars UN  
EXPNO: 2454  
PROCNO: 1  
Date\_ Time: 20170719 11:46  
INSTRUM: spect  
PROBHD: 5 mm PABBO BB-  
PULPROG: zgpg30  
TD: 65536  
SOLVENT: DMSO  
NS: 3624  
DS: 0  
SWH: 35714.285 Hz  
FIDRES: 0.544957 Hz  
AQ: 0.9175540 sec  
RG: 2050  
DW: 14.000 usec  
DE: 6.50 usec  
TE: 293.5 K  
D1: 1.00000000 sec  
D11: 0.03000000 sec  
TD0: 1

===== CHANNEL f1 =====  
NUC1: 13C  
P1: 9.00 usec  
PL1: -0.90 dB  
PL1W: 42.02801895 W  
SFO1: 100.6479784 MHz

===== CHANNEL f2 =====  
CPDPRG2: waltz16  
NUC2: 1H  
PCPD2: 90.00 usec  
PL2: -2.00 dB  
PL12: 14.48 dB  
PL13: 17.90 dB  
PL2W: 11.86359406 W  
PL12W: 0.26681873 W  
PL13W: 0.12139934 W  
SFO2: 400.2216009 MHz  
SI: 32768  
SF: 100.6353990 MHz  
WDW: EM  
SSB: 0  
LB: 1.00 Hz  
GB: 0  
PC: 1.40

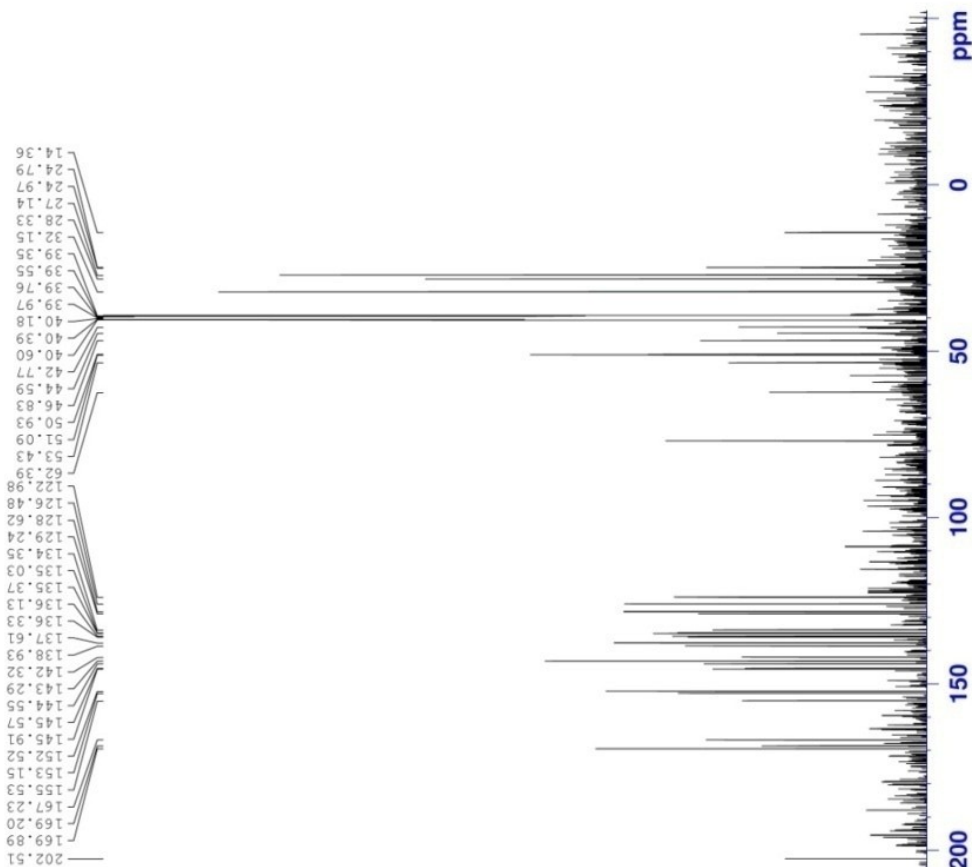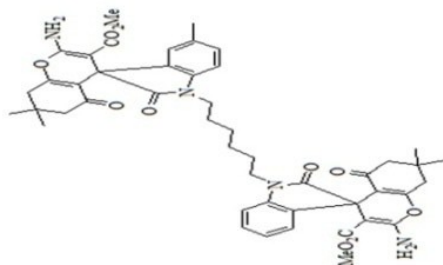

Supplement: RA-008-C7RA13133J-s001.pdf [file RA-008-C7RA13133J-s001.pdf]
